# Supplementary material for: PCV2 and PRV Coinfection Induces Endoplasmic Reticulum Stress via PERK-eIF2α-ATF4-CHOP and IRE1-XBP1-EDEM Pathways
Source: MDPI journal article supplement (doi:10.3390/ijms23094479), 2022-04-19
Supplement: s1 [file s1]

## **Supplementary Information for**

**PCV2 and PRV coinfection induces endoplasmic reticulum stress via PERK-eIF2 $\alpha$ -ATF4-CHOP and IRE1-XBP1-EDEM pathways**

Si Chen<sup>#</sup>, Xue Li<sup>#</sup>, Liying Zhang<sup>#</sup>, Xinwei Zhang, Guoyu Niu, Lin Yang, Weilong Ji, Linzhu Ren\*

\* **Correspondence:** Linzhu Ren

**Email:** [renlz@jlu.edu.cn](mailto:renlz@jlu.edu.cn)

**This PDF file includes:**

Figures S1 to S5

Table S1

## Supplemental figures

|          | PK                                                                                | PCV2                                                                               | PRV                                                                                 | PCV2+PRV                                                                             |
|----------|-----------------------------------------------------------------------------------|------------------------------------------------------------------------------------|-------------------------------------------------------------------------------------|--------------------------------------------------------------------------------------|
| GRP78    |  |  |  |   |
| PCV2-Cap |  |  |                                                                                     |   |
| PRV-gD   |  |                                                                                    |  |  |

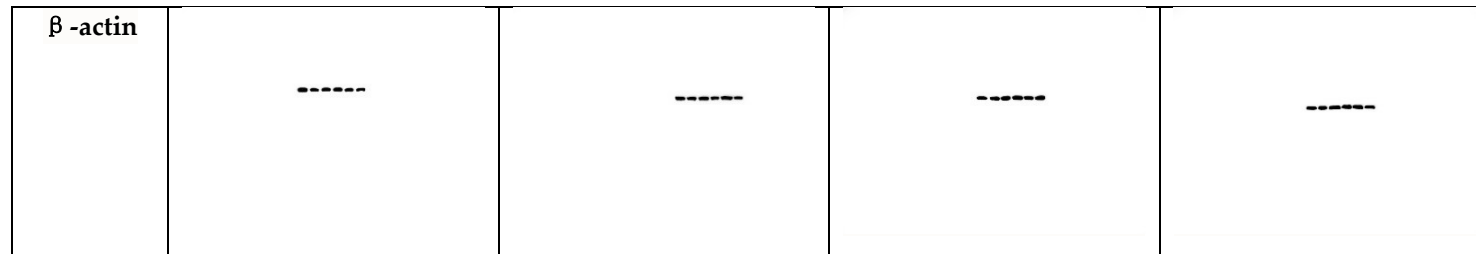

Figure S1 Original Western images used for preparing Figure 4B.

|                | PK                                                                                  | PCV2                                                                                 | PRV                                                                                   | PCV2+PRV                                                                              |
|----------------|-------------------------------------------------------------------------------------|--------------------------------------------------------------------------------------|---------------------------------------------------------------------------------------|---------------------------------------------------------------------------------------|
| ATF6           | 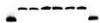   |     |    |    |
| PCV2-Cap       |    |    |                                                                                       |    |
| PRV-gD         |    |                                                                                      |    |    |
| $\beta$ -actin |  |  |  |  |

Figure S2 Original Western images used for preparing Figure 5B.

|        | PK                                                                                  | PCV2                                                                                 | PRV                                                                                   | PCV2+PRV                                                                              |
|--------|-------------------------------------------------------------------------------------|--------------------------------------------------------------------------------------|---------------------------------------------------------------------------------------|---------------------------------------------------------------------------------------|
| p-IRE1 |    |     |    |    |
| IRE1   |    |    |    |    |
| EDEM1  |  |  |  |  |

|                |                                                                                   |                                                                                    |                                                                                     |                                                                                     |
|----------------|-----------------------------------------------------------------------------------|------------------------------------------------------------------------------------|-------------------------------------------------------------------------------------|-------------------------------------------------------------------------------------|
| PCV2-Cap       |  |  |                                                                                     |  |
| PRV-gD         |  |                                                                                    |  |  |
| $\beta$ -actin |  |  |  |  |

Figure S3 Original Western images used for preparing Figure 6A.

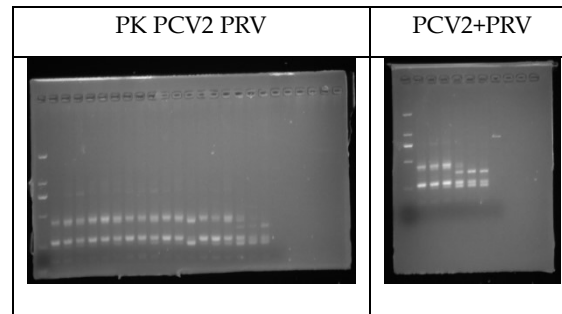

Figure S4: Original agarose gel images used for preparing Figure 6D.

|                 | PK                                                                                 | PCV2                                                                                | PRV                                                                                  | PCV2+PRV                                                                             |
|-----------------|------------------------------------------------------------------------------------|-------------------------------------------------------------------------------------|--------------------------------------------------------------------------------------|--------------------------------------------------------------------------------------|
| p-eIF2 $\alpha$ |   |   |   |   |
| eIF2 $\alpha$   |   |   |   |   |
| ATF4            |  |  |  |  |



|                |                                                                                     |                                                                                      |                                                                                       |                                                                                       |
|----------------|-------------------------------------------------------------------------------------|--------------------------------------------------------------------------------------|---------------------------------------------------------------------------------------|---------------------------------------------------------------------------------------|
| CHOP           |    |     |    |    |
| PCV2-Cap       |    |     |                                                                                       |    |
| PRV-gD         |    |                                                                                      |    |    |
| $\beta$ -actin |  |  |  |  |

Figure S5 Original Western images used for preparing Figure 7C.

## Supplemental Tables

**Table S1. Primers used in this study.**

| Genes             | Sequence (5'-3')                                           | GenBank ID     | Size (bp) | Application         |
|-------------------|------------------------------------------------------------|----------------|-----------|---------------------|
| <i>grp78</i>      | F: GTTCTTGTTGGTGGCTCTACT<br>R: ACAGCCTCATCTGGGTTTATG       | XM_001927795.7 | 104       | qPCR                |
| <i>atf4</i>       | F: GTGGAAATCTCGGAAGGAGATAG<br>R: AGGAGTCAGGGCTCATACA       | NM_001123078.1 | 127       | qPCR                |
| <i>chop</i>       | F: GAGGAGGAAGACCAAAGAAGAC<br>R: CTGTGCCACTTTCCTTTCATT      | NM_001144845.1 | 117       | qPCR                |
| <i>xbp1</i>       | F: GAGACAGAGAGCCAAGCTAATG<br>R: GATACCCAGCTCTGGAATGAAG     | NM_001142836.1 | 138       | qPCR                |
| <i>(u/s) xbp1</i> | F: GGCAGAGACCAAGGGAATG<br>R: GGGTCGACTTCTGGGAGCTG          | NM_001142836.1 | 263       | PCR <sup>[16]</sup> |
| <i>edem1</i>      | F: GCAATCGTGTTCTGATGAAAG<br>R: GGGAGAGCAGGTCAAATCAA        | XM_021069285.1 | 100       | qPCR                |
| <i>atf6</i>       | F: ACTGGAGAGTAGGTGAGAGAAG<br>R: TTCCAAGTAGATGGGTGGATTG     | XM_021089515.1 | 137       | qPCR                |
| <i>gapdh</i>      | F: GCCATCACCATCTTCCAGG<br>R: TCACGCCCATCACAAACAT           | NM_001206359.1 | 190       | qPCR                |
| PRV               | F: GGTTC AACGAGGGCCAGTACCG<br>R: GCGTCAGGAATCGCATCACGT     | NC_006151.1    | 195       | qPCR                |
| PCV2              | F: TGTAGTATTCAAAGGGCACAGAGC<br>R: CGGATATACTATCAAGAAAACCAC | NC_005148.1    | 131       | qPCR                |
